# Supplementary material
Source: Springer Nature journal article supplement (https://www.springermedizin.de/resource/supplementary/12916_2013_929_MOESM7_ESM.pdf/9598838)

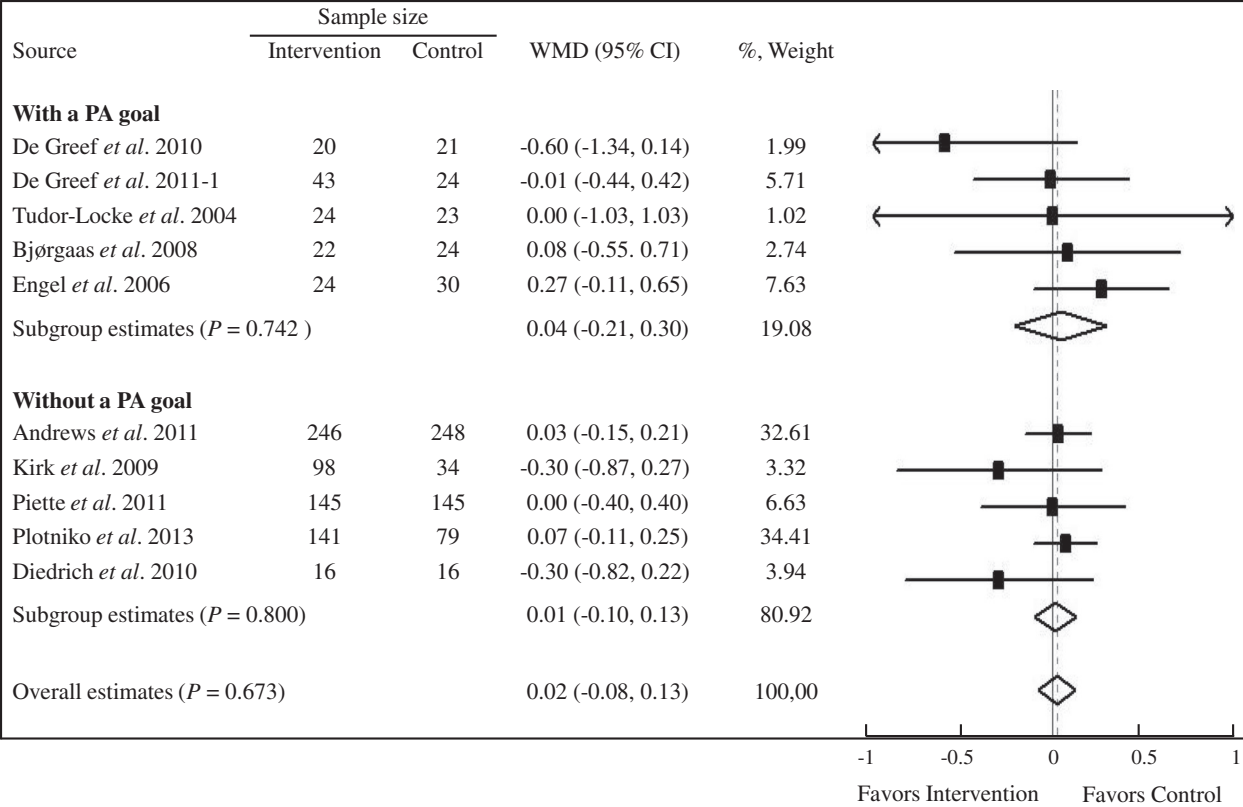

Supplement: MOESM7 [file 9598838]
